# Supplementary material for: In Vitro Characterization of Human CD24hiCD38hi Regulatory B Cells Shows CD9 Is Not a Stable Breg Cell Marker
Source: MDPI journal article supplement (doi:10.3390/ijms22094583), 2021-04-27
Supplement: s1 [file s1]

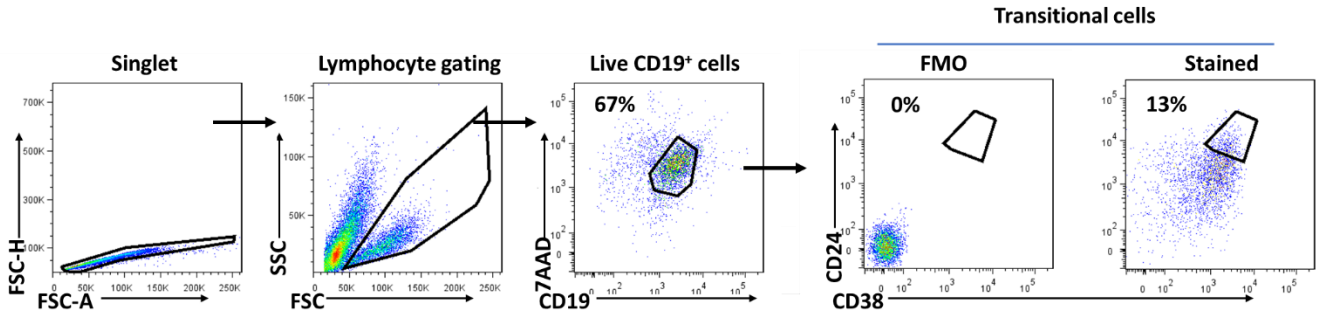

**Supplementary Figure 1.** Gating strategy for analysis of transitional CD24<sup>hi</sup>CD38<sup>hi</sup> B cells. Singlets were identified using FSC-A versus FSC-H plot followed by FSC vs SSC plot for exclusion of debris and dead cells. Live CD19<sup>+</sup> cells were selected based on negative 7AAD staining. Subsequently, the gating of transitional cells was set on fluorescent minus one (FMO) control.

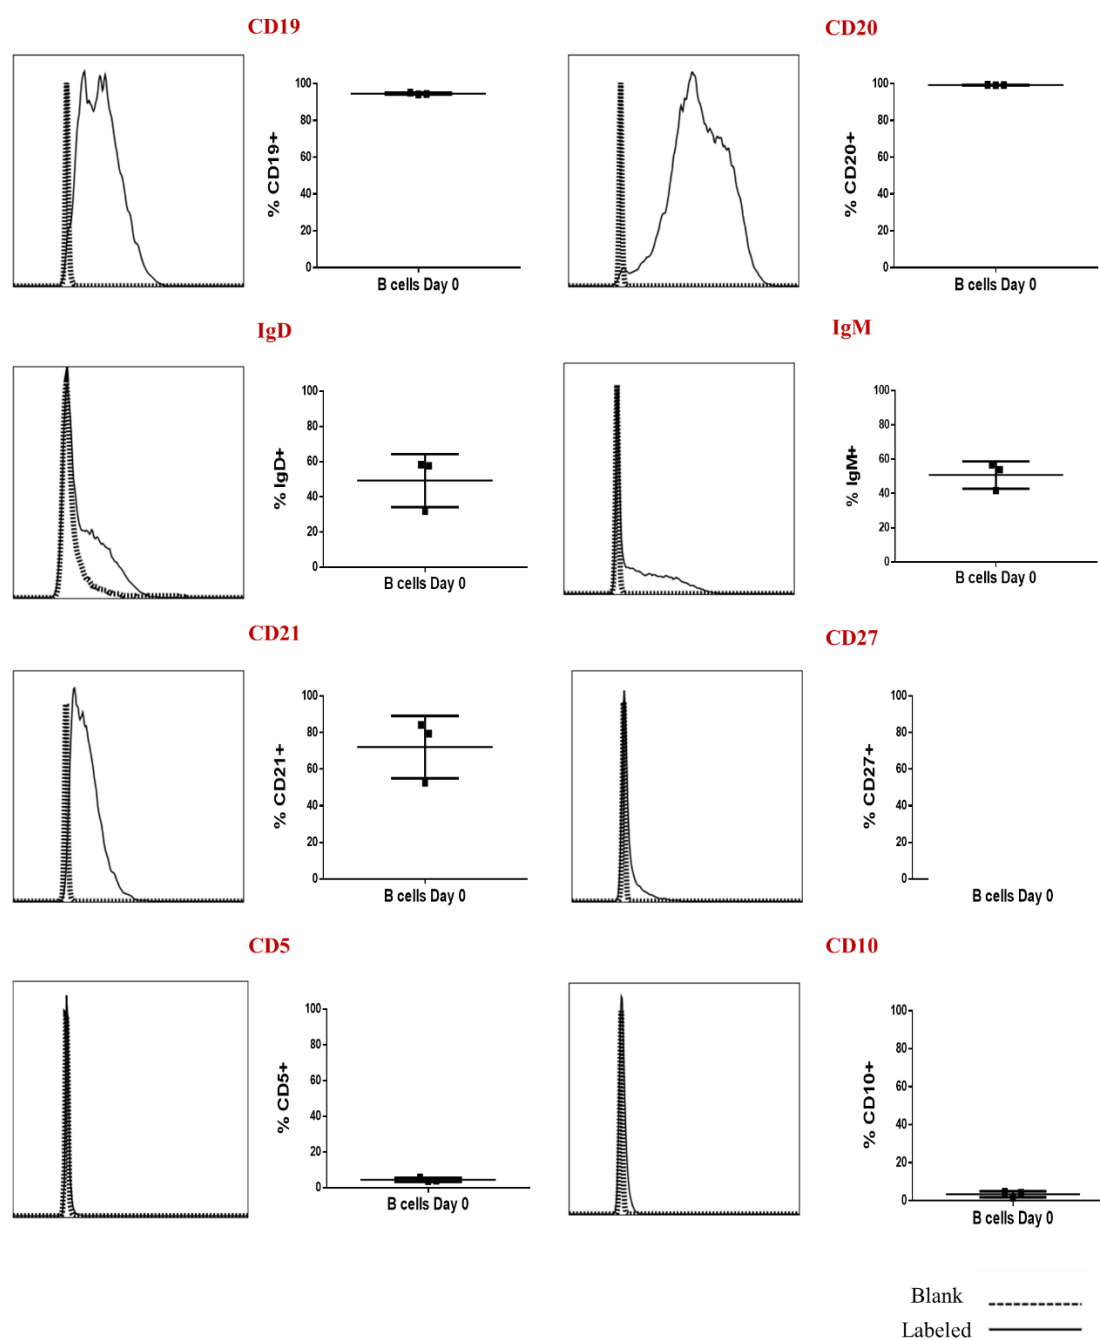

**Supplementary Figure 2.** Expression of B cell markers after CD43- isolation. Total tonsil cells were single stained for CD19, CD20, CD21, CD27, CD5, CD10, IgD and IgM then subjected to flow cytometry analysis. Solid line; Single Stain sample, Dotted line; Blank, no labelling with fluorochrome-conjugated, sample. Data shows B cells from 3 different tonsil donors.
